# Supplementary material for: Accessible bidentate diol functionality within highly ordered composite periodic mesoporous organosilicas
Source: Royal Society of Chemistry journal article supplement (doi:10.1039/c6nj00401f), 2016-01-01
Supplement: c6nj00401f1.pdf [file c6nj00401f1.pdf]

## Supplementary Information

### Accessible bidentate diol functionality within highly ordered composite periodic mesoporous organosilicas

Lacey M. Reid, Gang Wu and Cathleen M. Crudden\*

*Department of Chemistry, Queen's University, 90 Bader Lane, Kingston, Ontario, Canada*

---

#### Contents:

##### 1. Solid-state NMR characterization of materials

##### 2. NMR characterization of precursors

---

##### 1. Solid-state NMR characterization of materials

##### 1.1 Deprotection of solid-state MeO- and MEMO-PMOs

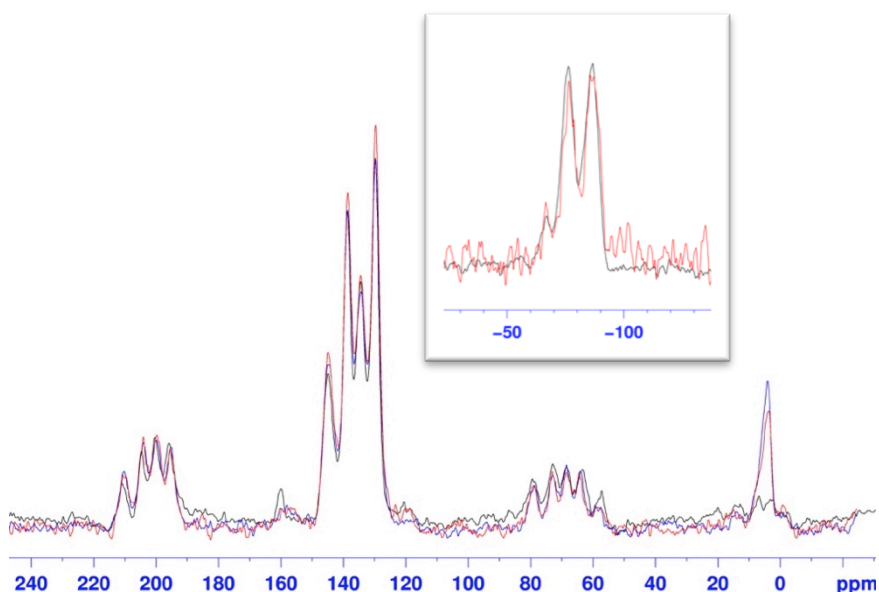

**Figure S1.** Solid-state  $^{13}\text{C}$  CP MAS NMR of MeO-cPMO before deprotection (black), passivated with TMS and subsequently deprotected with boron tribromide over 24 hours at room temperature (blue), and subjected to deprotection a second time using the same conditions (red); and  $^{29}\text{Si}$  NMR (inset) of MeO-cPMO material before (black) and after (red) deprotection

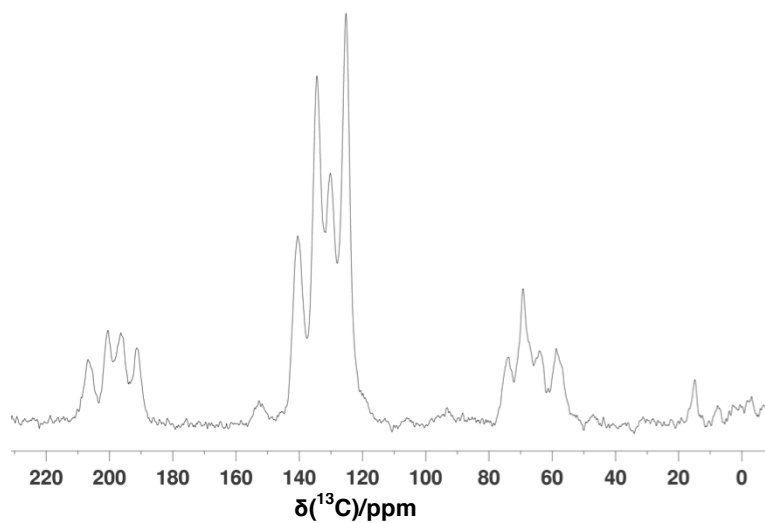

**Figure S2.** Solid-state  $^{13}\text{C}$  CP MAS NMR spectra of  $^{20}\text{MEMO-cPMO}$ , after extraction of the surfactant with acidified ethanol

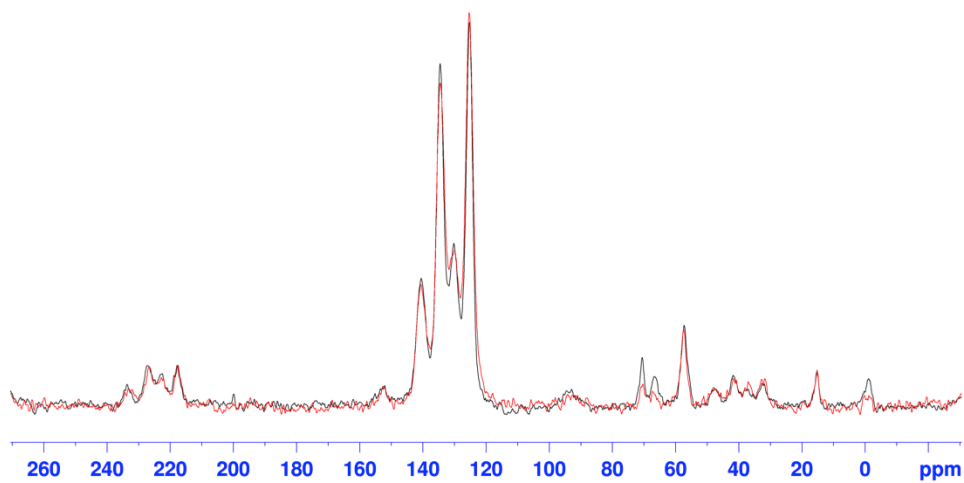

**Figure S3.** Solid-state  $^{13}\text{C}$  CP MAS NMR of TMS-passivated MEMO-PMO treated with acidified ethanol at  $55\text{ }^{\circ}\text{C}$  for 6 hours (black) and subsequently treated for 24 hours (red) to cleave MEM groups

## 1.2 Preparation of phosphate ester materials

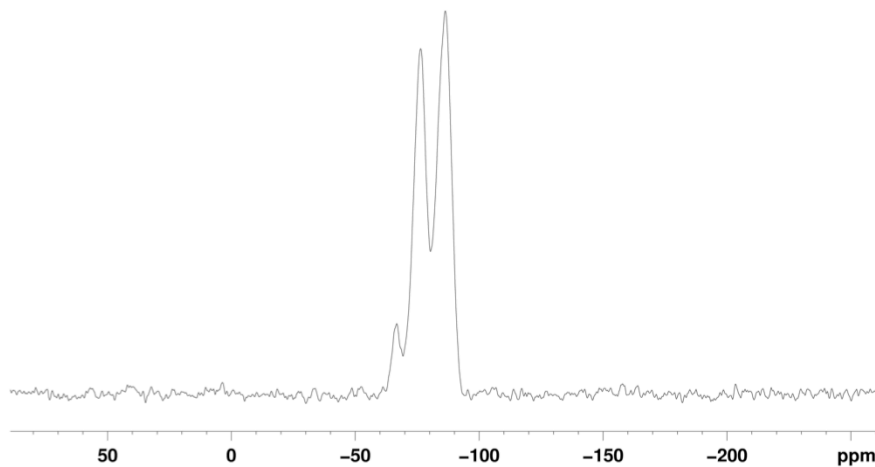

**Figure S4.** Solid-state  $^{29}\text{Si}$  CP MAS NMR of BTESBp PMO treated with phosphorus oxychloride

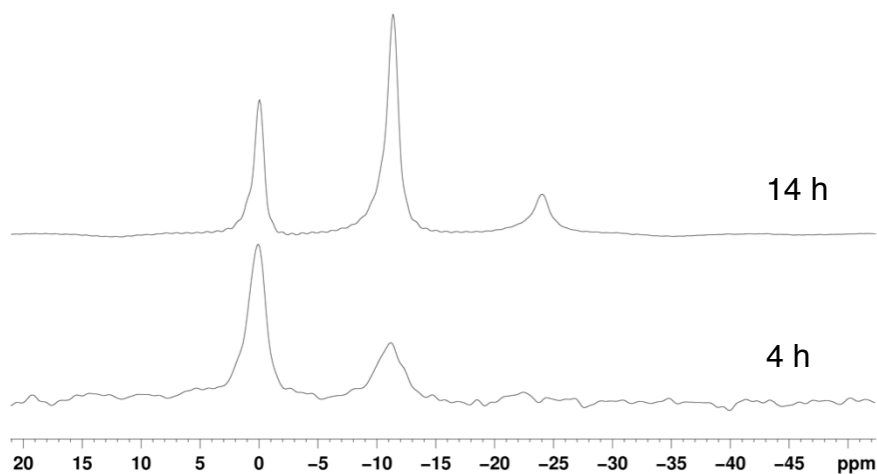

**Figure S5.** Solid-state  $^{31}\text{P}$  MAS NMR of MCM-41 treated with  $\text{POCl}_3$  for 4 h or 14 h to prepare HOP(O)-MCM showed an increase in the -12, -22 ppm signals with longer treatment times, indicating a higher degree of  $[\text{O}=\text{P}-(\text{OSi})(\text{OH})_2]$  and  $[\text{O}=\text{P}-(\text{OSi})_2(\text{OH})]$  formation at longer exposures

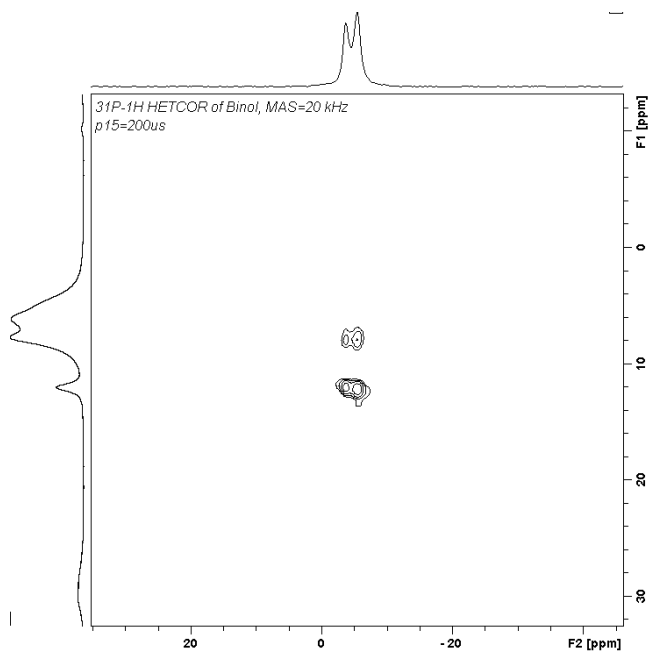

**Figure S6.** High-field solid -state  $^{31}\text{P}$ - $^1\text{H}$  HETCOR spectra of BINOL hydrogen phosphate reference

### 1.3 Deconvolution and line fitting of solid-state $^{13}\text{C}$ CP MAS NMR spectra

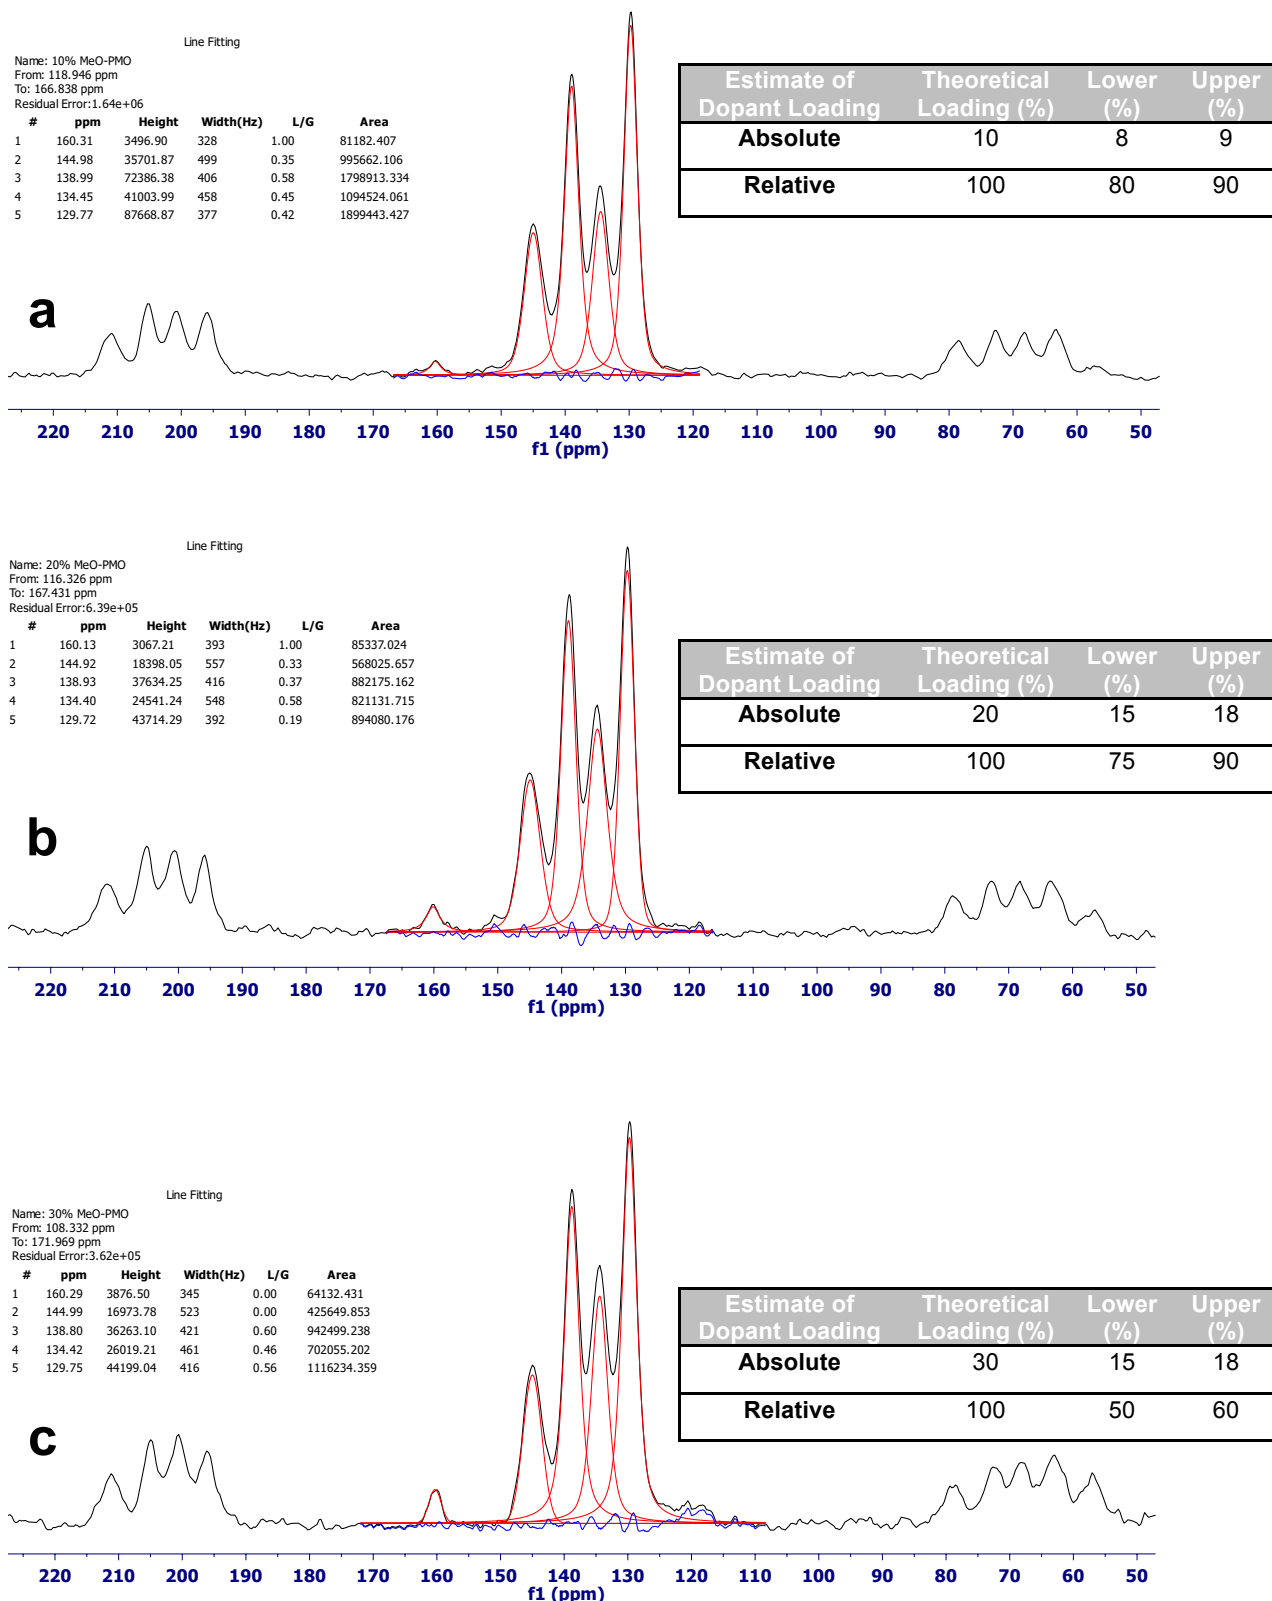

**Figure S 7.** Deconvolution and line fitting of  $^{13}\text{C}$  CP MAS NMR spectra of a)  $^{10}\text{MeO-PMO}$ , b)  $^{20}\text{MeO-PMO}$  and; c)  $^{30}\text{MeO-PMO}$  showing fitted peak area report and calculated estimates of dopant loadings relative to the theoretical loading

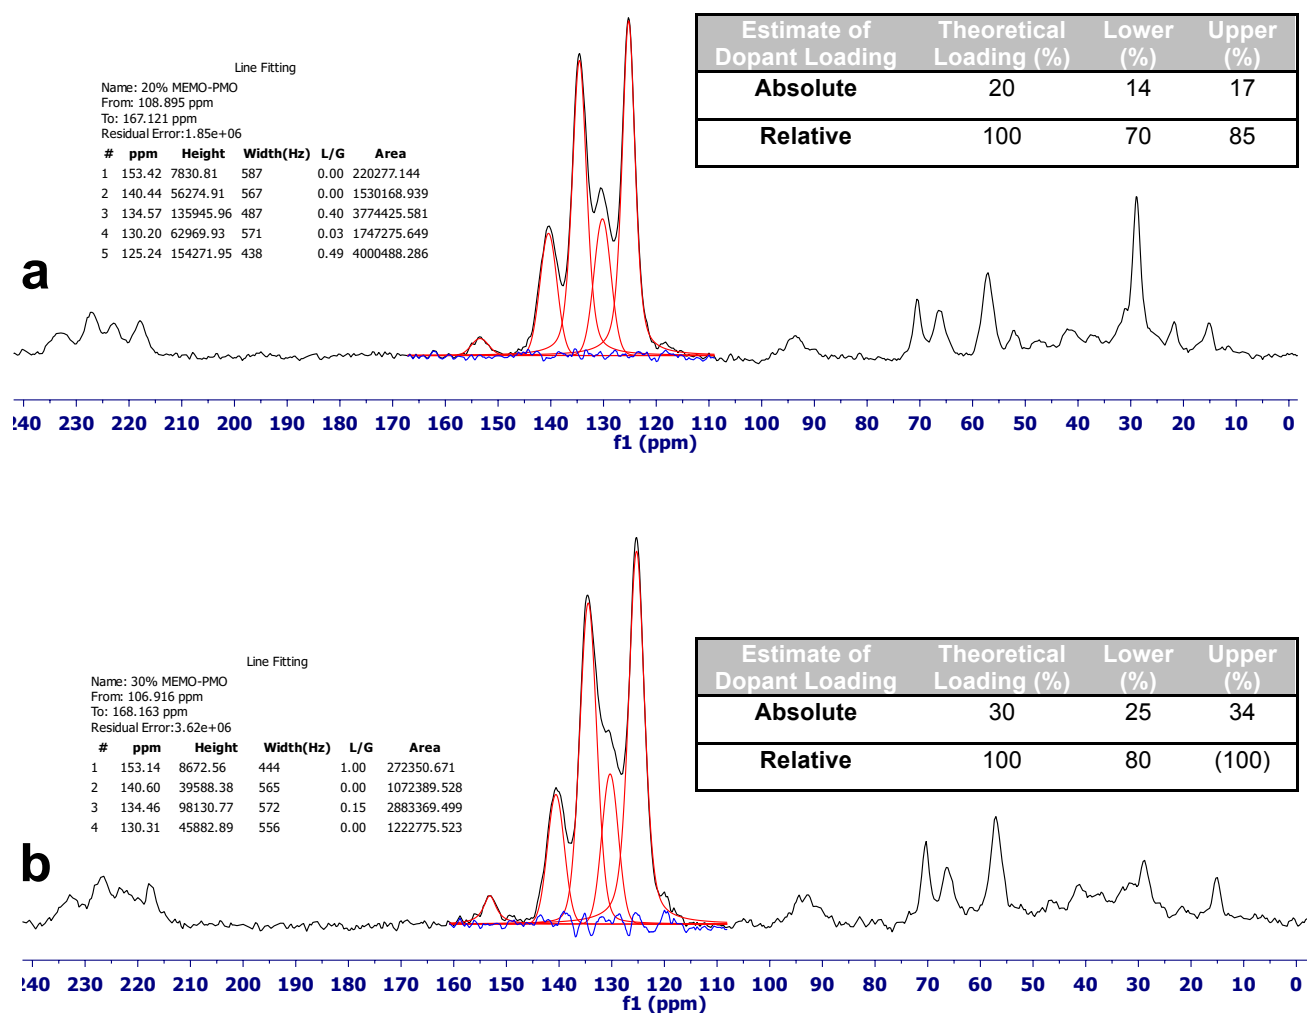

**Figure S 8.** Deconvolution and line fitting of  $^{13}\text{C}$  CP MAS NMR spectra of a)  $^{20}\text{MEMO-PMO}$  and; b)  $^{30}\text{MEMO-PMO}$  showing fitted peak area reports and calculated estimates of dopant loadings relative to the theoretical loading

## Estimate calculations

Deconvolution was achieved using the line-fitting feature of MestRec Nova NMR processing software. Estimates were calculated based on the ratio of areas of peaks 1 and 2, representing quaternary carbon signals from (Ar)C-O (dopant) and (Ar)C-C(Ar) (bulk and dopant), respectively. The dopant (Ar)C-C(Ar) overlaps completely here and thus (Ar)C-C(Ar) (bulk) cannot be evaluated independently. Upper estimates subtract  $\text{Area}_1$  of (Ar)C-O (dopant) from  $\text{Area}_2$  (bulk + dopant overlapped with bulk). Lower limits assume  $\text{Area}_1$  is negligible to  $\text{Area}_2$  and the overlapped signal is not subtracted. See example calculation for  $^{10}\text{MeO-PMO}$ :

$$\text{Lower estimate limit: } \frac{\text{mol\% dopant}}{\text{mol\% bulk}} = \frac{\text{Area}_1}{\text{Area}_2} \times 100\% = \frac{81182.407}{995662.106} \times 100\% = 8\%$$

$$\text{Upper estimate limit: } \frac{\text{mol\% dopant}}{\text{mol\% bulk}} = \frac{\text{Area}_1}{(\text{Area}_2 - \text{Area}_1)} \times 100\% = \frac{81182.407}{(995662.106 - 81182.407)} \times 100\% = 9\%$$

## 2. NMR characterization of precursors

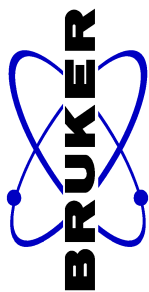

Proton 300 MHz  
dihydroxybiphenyl

7.424  
7.400  
7.281  
6.981  
6.954

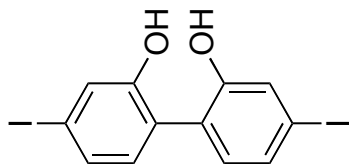

```
Current Data Parameters
NAME      LR120310
EXPNO     2
PROCNO    1

F2 - Acquisition Parameters
Date_     20120310
Time      17.16
INSTRUM   spect
PROBHD    5 mm QXI 1H Z1
PULPROG   zg45
TD         65536
SOLVENT   CDCl3
NS         16
DS         0
SWH        6172.839 Hz
FIDRES     0.1094190 Hz
AQ         5.3084660 sec
RG         645.1
DW         81.000 use
DE         6.00 use
TE         300.0 K
D1         1.00000000 sec
TD0        1

===== CHANNEL f1 =====
NUC1       1H
P1         10.00 use
PL1        0.60 dB
SFO1       300.1324010 MHz

F2 - Processing parameters
SI         65536
SF         300.1300000 MHz
WDW        EM
SSB        0
LB         0.10 Hz
GB         0
PC         1.00
```

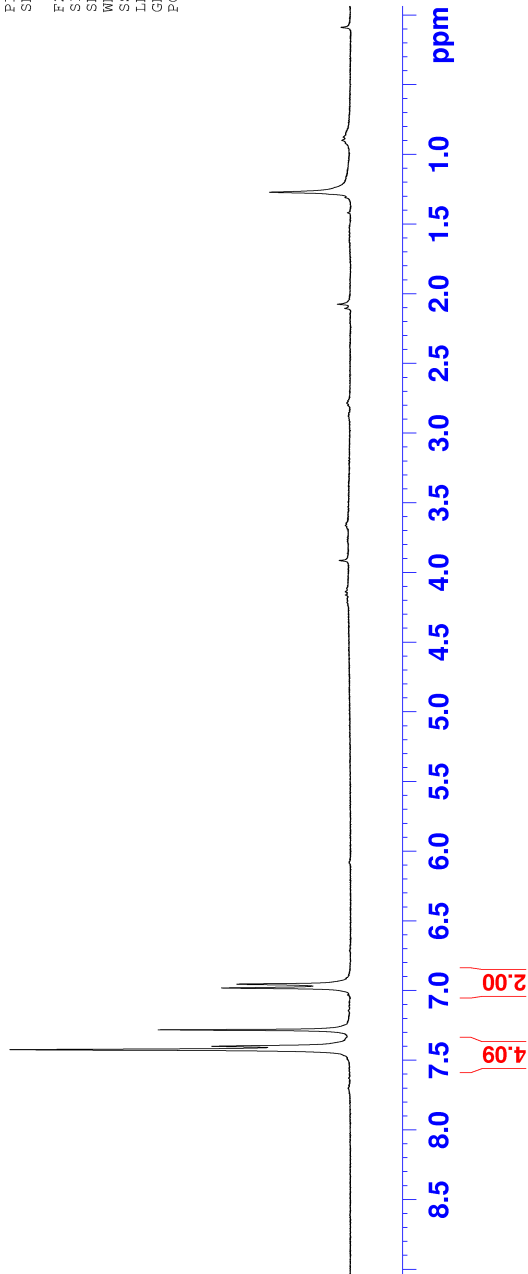

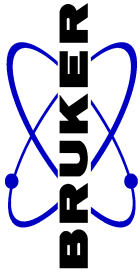

proton NMR on bbfo probe 400 MHz

0.095  
1.279  
3.395  
3.513  
3.521  
3.524  
3.528  
3.536  
3.679  
3.687  
3.691  
3.703  
5.150  
6.905  
6.925  
7.285  
7.403  
7.407  
7.423  
7.427  
7.614  
7.618

Current Data Parameters  
NAME IRI68-140326  
EXPNO 1  
PROCNO 1

F2 - Acquisition Parameters  
Date\_ 20161216  
Time 12.56  
INSTRUM spect  
PROBHD 5 mm PABBO  
PULPROG zgpg30  
TD 65536  
SOLVENT CDCl3  
NS 0  
DS 0  
SWH 8225.889 Hz  
FIDRES 0.225899 Hz  
AQ 3.9115316 sec  
RG 60.181 ussec  
DE 6.00 ussec  
TE 297.0 K  
D1 1.00000000 sec

===== CHANNEL f1 =====  
NUC1 1H  
P1 15.00 usec  
PL1 400.1324110 MHz  
SFO1 400.1300000 MHz

F2 - Processing parameters  
SI 32768  
WDW EM  
SS 0  
LB 0.30 Hz  
GB 0  
FC 1.00

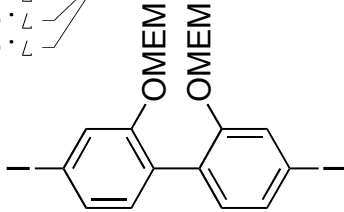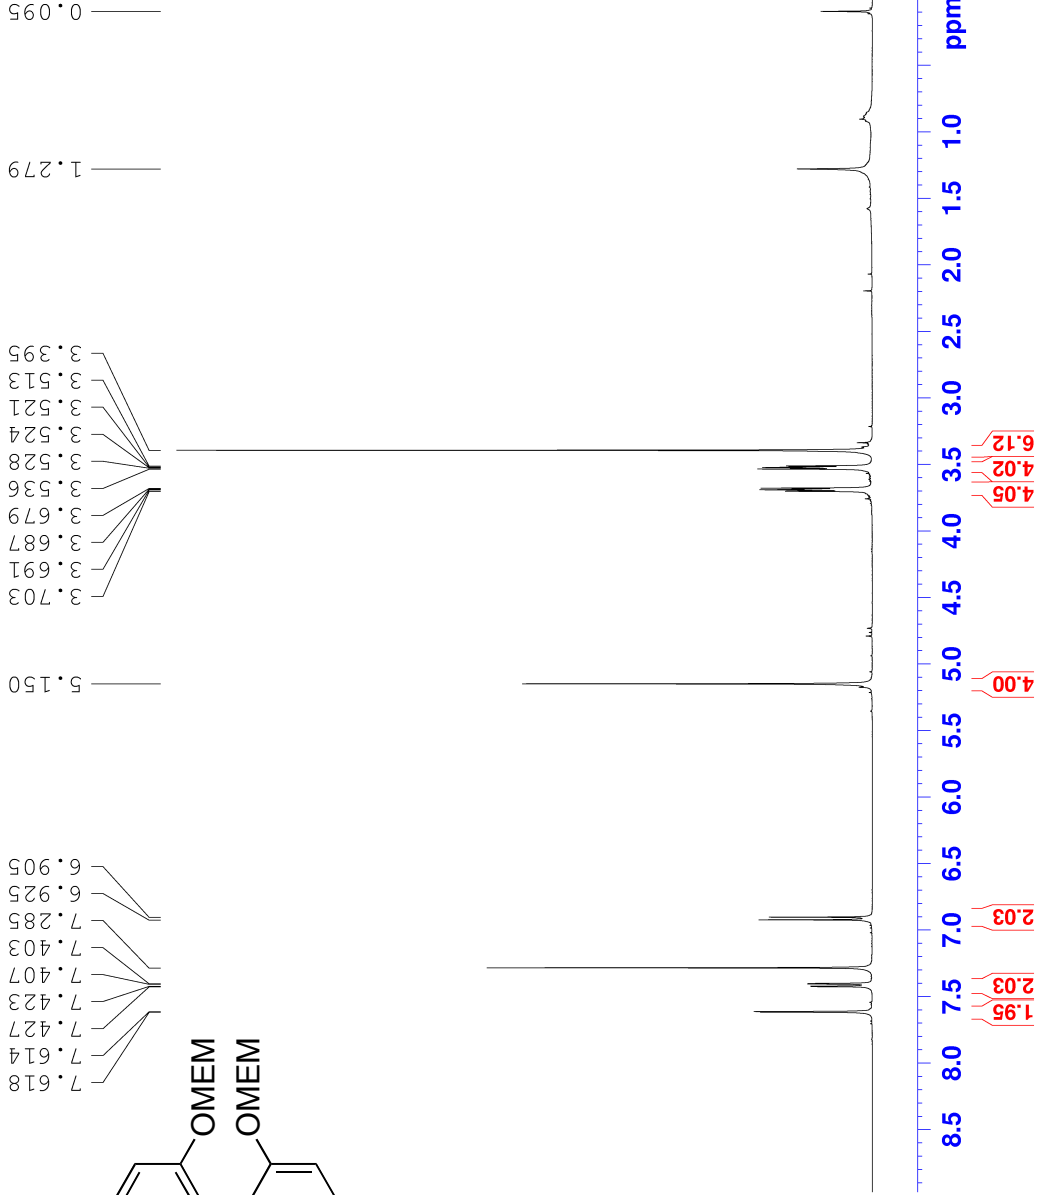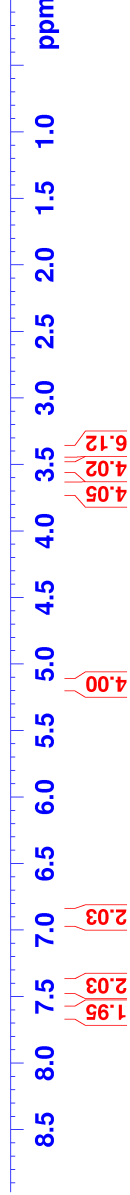



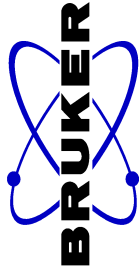

Carbon NMR on bbfo probe

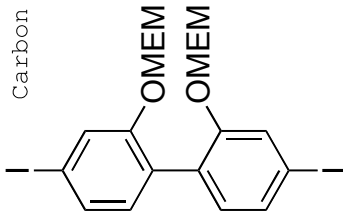

Current Data Parameters LR168-re  
NAME LR168-re  
EXPNO 3  
PROCNO 1

F2 - Acquisition Parameters  
Date\_ 20140404  
Time 13.48  
INSTRUM spect  
PROBHD 5 mm PABBO BB/  
PULPROG zgpg30  
ID 65536  
SOLVENT CDCl3  
NS 518  
DS 0  
SWH 24038.461 Hz  
FIDRES 0.381098 Hz  
AQ 1.361098 se  
RG 1024  
DW 20.800 us  
DE 6.00 us  
TE 297.9 K  
D1 0.20000000 se  
d11 0.03000000 se  
TD0 1

===== CHANNEL f1 =====  
NUC1 13C  
P1 10.00 us  
PL1 -3.00 dB  
SFO1 100.6228298 MH

===== CHANNEL f2 =====  
CPDPRG2 waltz16  
NUC2 1H  
P2 100.00 us  
PL2 -2.00 dB  
PL12 14.48 dB  
SFO2 400.1316005 MH

F2 - Processing parameters  
SI 32768  
SF 100.6127690 MH  
WDW EM  
SSB 0  
LB 1.00 Hz  
GB 0  
PC 1.40

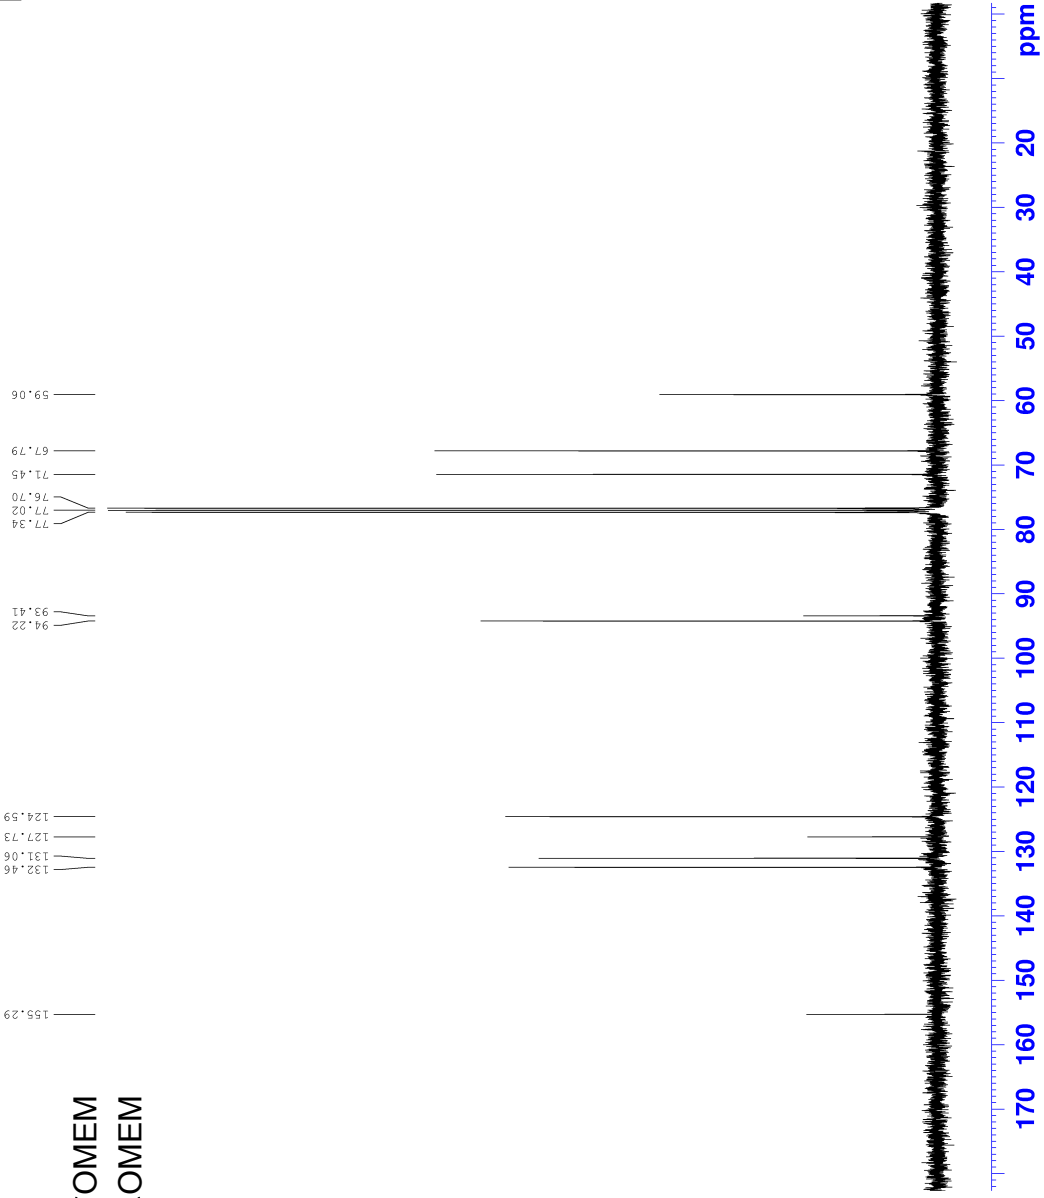

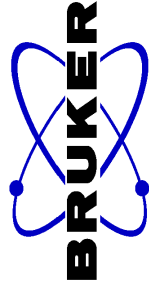

proton NMR on bbfo probe 400 MHz

7.373  
7.372  
7.285  
7.264

3.961  
3.944  
3.926  
3.909  
3.641  
3.630  
3.626  
3.618  
3.618  
3.474  
3.466  
3.462  
3.450  
3.353

1.317  
1.299  
1.282

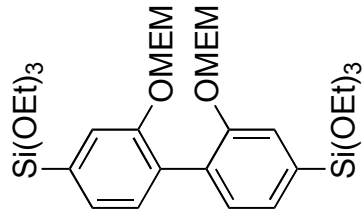

Current Data Parameters  
Name LR374-col-f12-16  
EXPNO 1  
PROCNO 1

F2 - Acquisition Parameters  
Date\_ 20140415  
Time\_ 19.32  
INSTRUM spect  
PROBHD 5 mm PABBO BB/  
PULPROG zgpg30  
TD 65536  
SOLVENT CDCl3  
NS 4  
DS 0  
SWH 8250.825 Hz  
FIDRES 0.128898 Hz  
AQ 3.9715316 sec  
RG 16  
DWA 60.600 usec  
DE 6.600 usec  
TE 288.5 K  
D1 1.00000000 sec  
TD0 1

===== CHANNEL f1 =====  
NUC1 1H  
P1 15.00 usec  
PL1 -2.00 dB  
SFO1 400.1324710 MHz

F2 - Processing parameters  
SI 32768  
SF 400.1300000 MHz  
WDW EM  
SSB 0  
LB 0.30 Hz  
GB 0  
PC 1.00

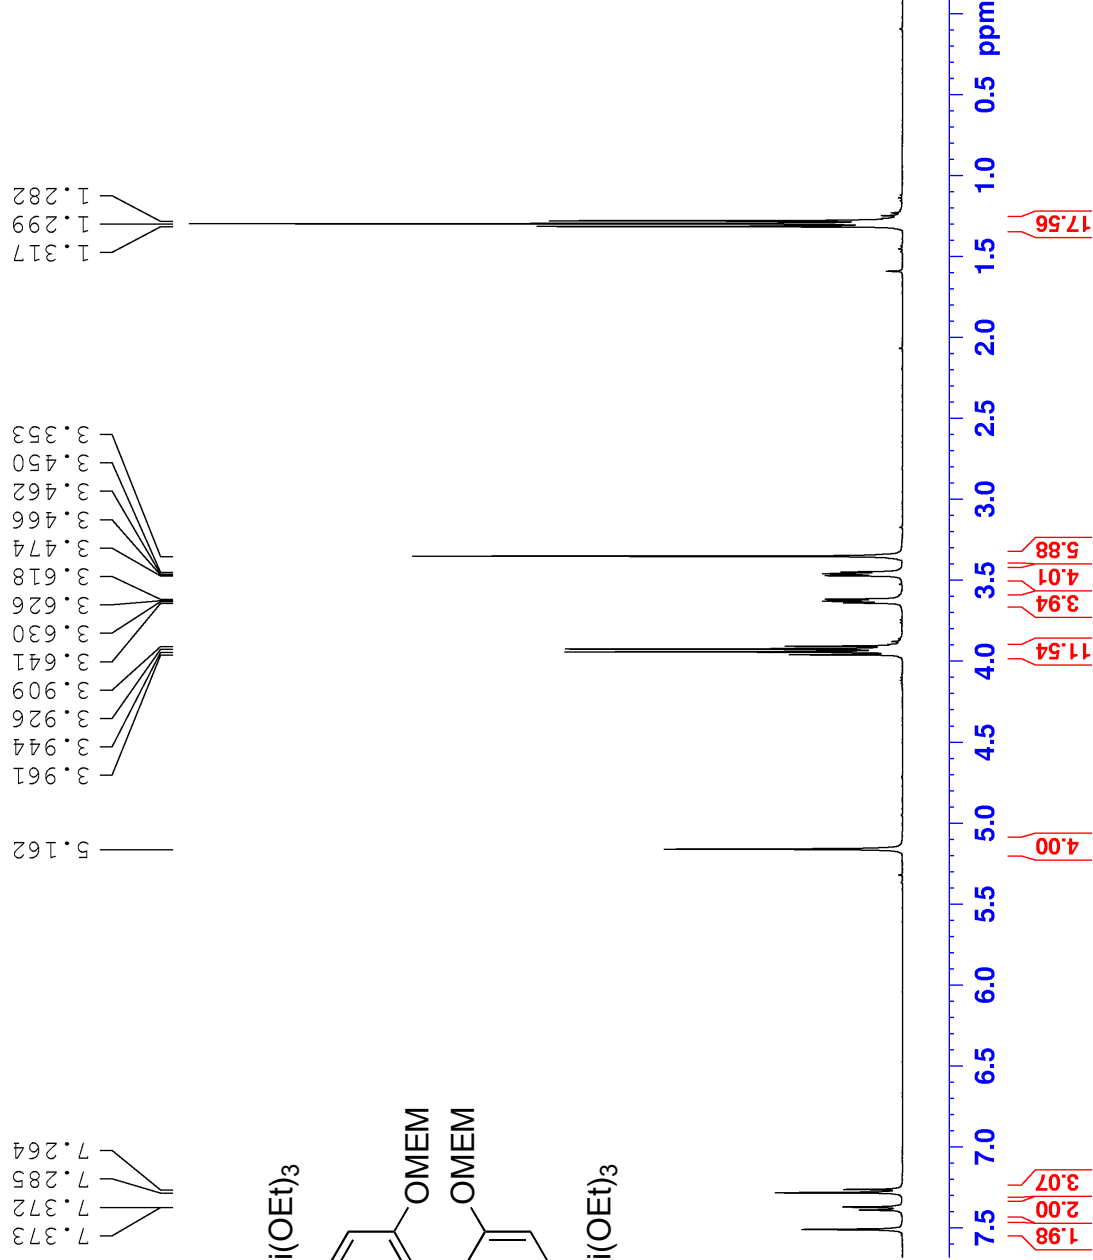

1.98

2.00

3.07

4.00

11.54

3.94

4.01

5.88

17.56

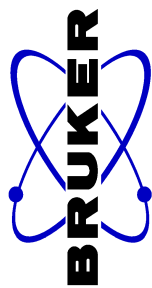

Current Data Parameters  
NAME LR374-co1-f12-16  
EXNO 3  
PROCNO 1

F2 - Acquisition Parameters  
Date\_ 20140415  
Time 20:07  
INSTRUM spect  
PROBHD 5 mm PABBO BB/  
PULPROG zgpg30  
TD 65536  
SOLVENT CDCl3  
NS 1024  
DS 0  
SWH 24038.461 Hz  
FIDRES 0.366798 Hz  
AQ 1.3631988 sec  
RG 101.6  
DW 20.800 us  
DE 6.00 us  
TE 298.3 K  
D1 0.20000000 sec  
d11 0.03000000 sec  
TD0 1

===== CHANNEL f1 =====  
NUC1 13C  
P1 10.00 us  
PL1 3.00 dB  
SFO1 100.6228298 MHz

===== CHANNEL f2 =====  
CPDPRG2 waltz16  
NUC2 1H  
PCPD2 100.00 us  
PL2 -2.00 dB  
PL12 14.48 dB  
SFO2 400.1316005 MHz

F2 - Processing parameters  
SI 32768  
SF 100.6127690 MHz  
WDW EM  
SSB 0  
LB 1.00 Hz  
GB 0  
PC 1.40

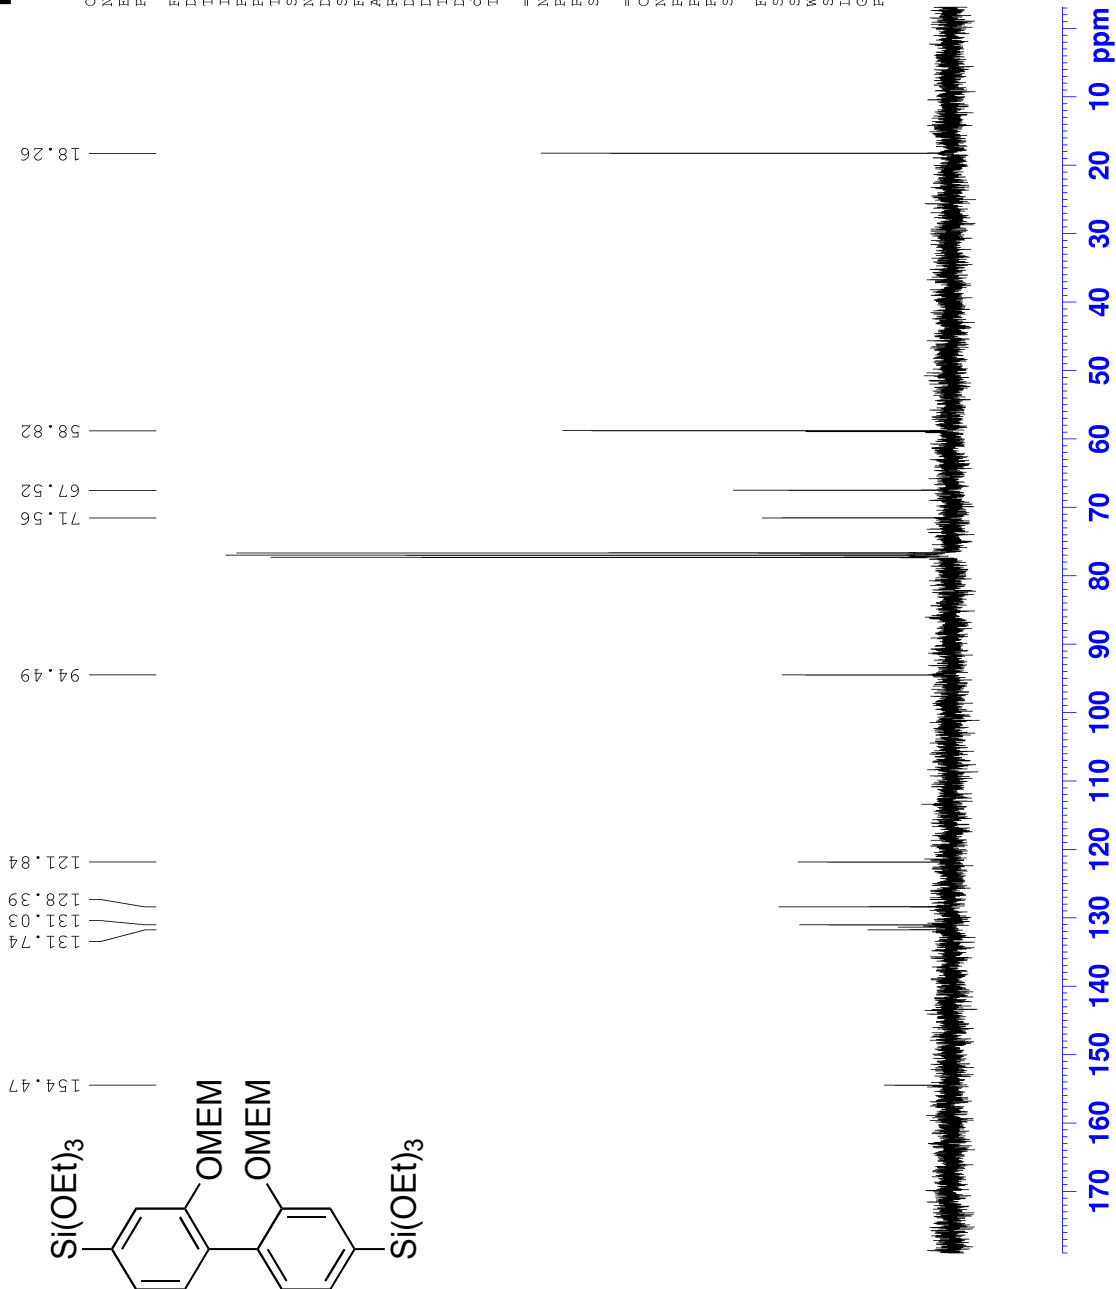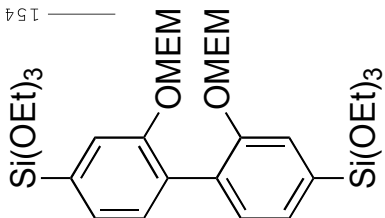

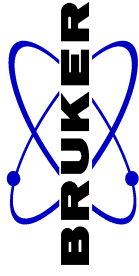

Current Data Parameters  
NAME LR312 f20-31  
EXPNO 1  
PROCNO 1

F2 - Acquisition Parameters  
Date\_ 20130913  
Time 16.38  
INSTRUM spect  
PROBHD 5 mm QXI 1H ZL  
PULPROG zg45  
TD 65536  
SOLVENT CDCl3  
NS 16  
DS 16  
SWH 6172.839 H  
FIDRES 0.094190 H  
AQ 5.3084660 S  
RG 1016  
DG 81.000 u  
DE 16.000 u  
TE 300.0 K  
D1 1.00000000 S  
TD0 1

===== CHANNEL f1 =====  
NUC1 1H  
P1 10.00 u  
PL1 0.60 G  
SFO1 300.1324010 M

F2 - Processing parameters  
SI 65536  
SF 300.1300000 M  
WDW EM  
SSB 0  
LB 0.10 H  
GB 0  
PC 1.00

Proton 300 MHz

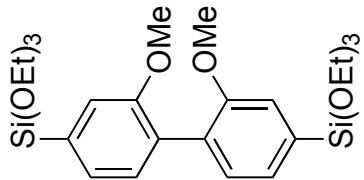

7.337  
7.312  
7.280  
7.274

3.976  
3.953  
3.930  
3.907  
3.812

1.327  
1.304  
1.281

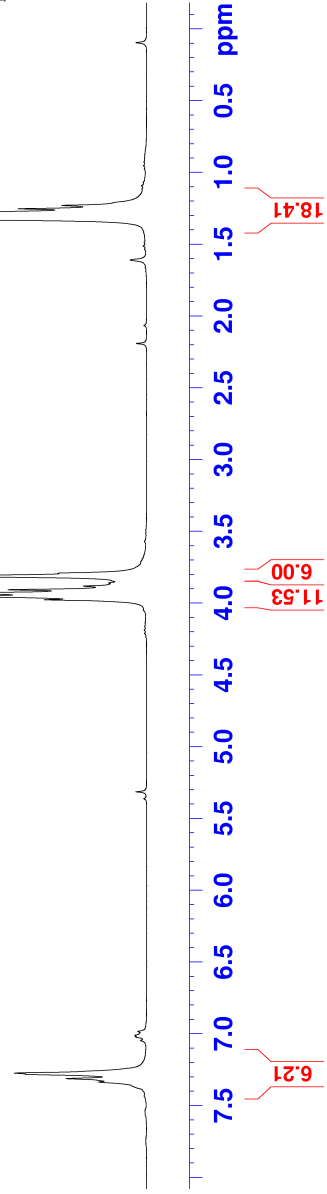

6.21

6.00

18.41

Carbon-13 {H}  
75.47 MHz

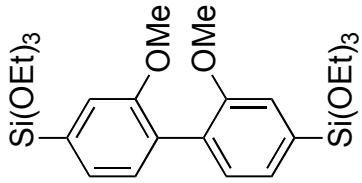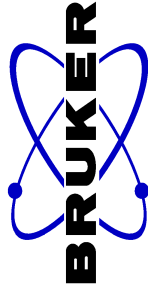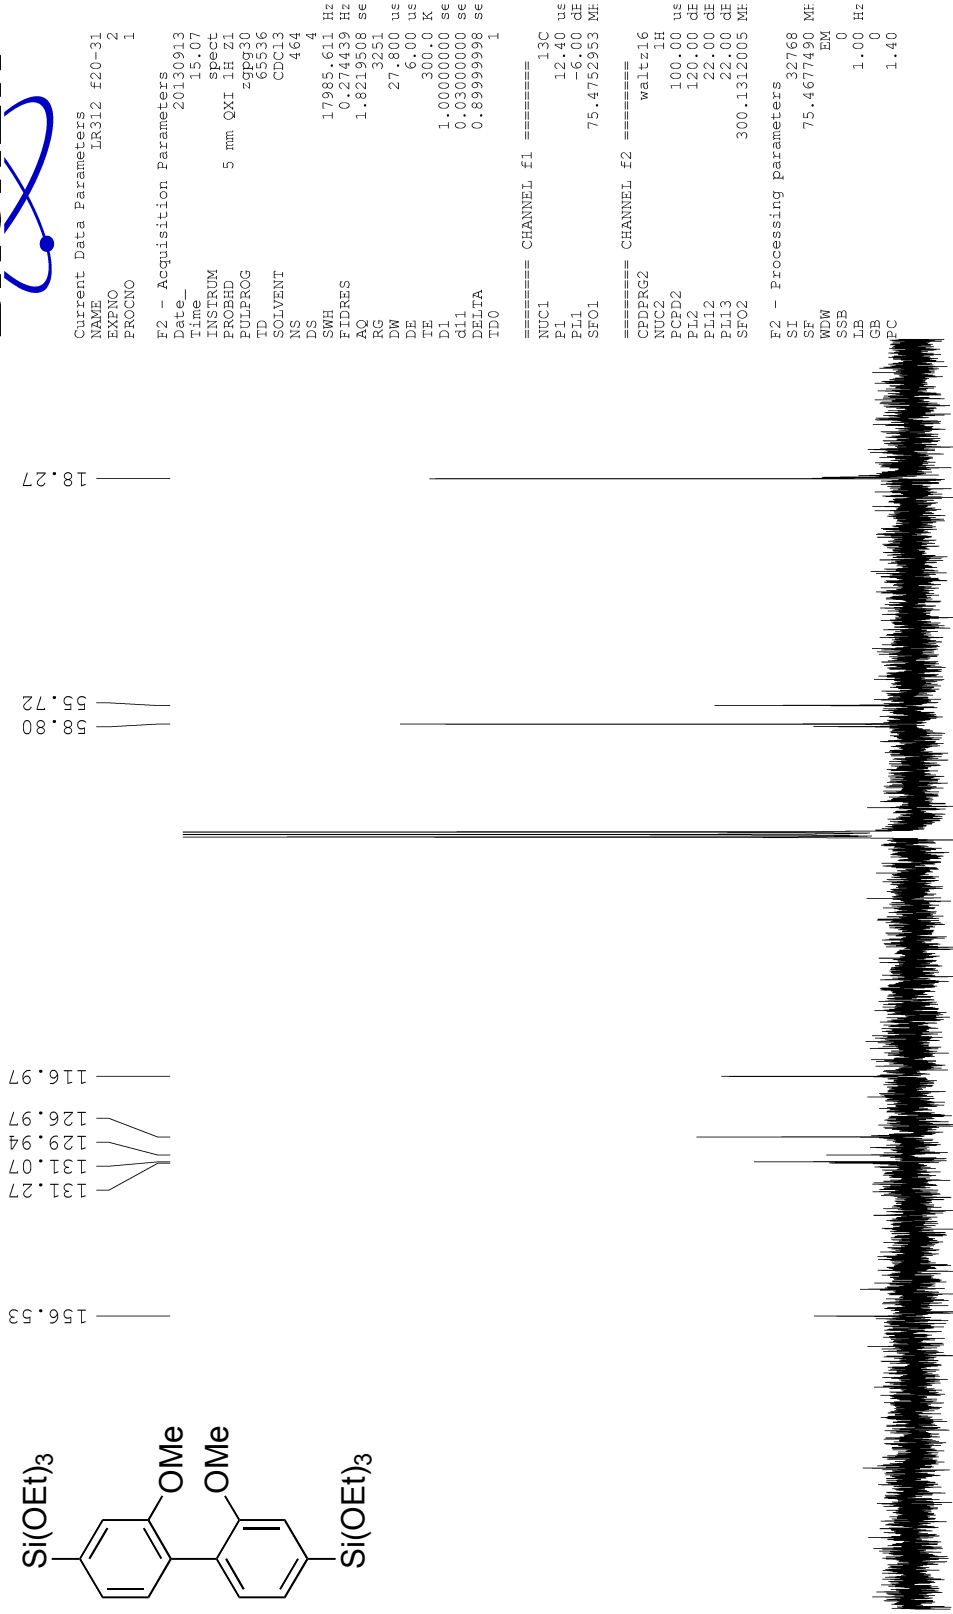

proton NMR on bbfo probe 400 MHz

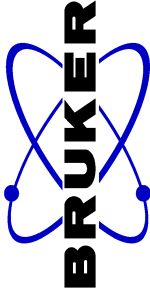

7.722  
7.703  
7.584  
7.382  
7.362

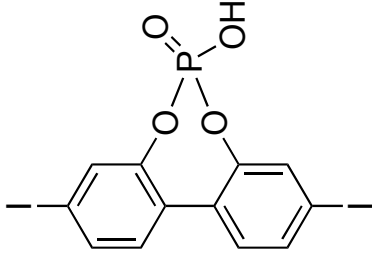

Current Data Parameters  
NAME LR442-recrys  
EXPNO 2  
PROCNO 1

F2 - Acquisition Parameters  
Date\_ 20150305  
Time 16.30  
INSTRUM spect  
PROBHD 5 mm FAPBO BB/  
PULPROG zgpg30  
TD 65536  
SOLVENT CDCl3  
NS 4  
DS 0  
SWH 8250.825 F  
FIDRES 0.125898 F  
AQ 3.9716316 s  
RG 256  
DW 60.600 u  
DE 6.00 u  
TE 295.7 K  
D1 1.00000000 s  
TD0 1

===== CHANNEL f1 =====  
NUC1 1H  
P1 15.00 u  
PL1 -2.00 C  
SFO1 400.1324710 M

F2 - Processing parameters  
SI 32768  
SF 400.1300000 M  
WDW EM  
SSB 0  
LB 0.30 F  
GB 0  
PC 1.00

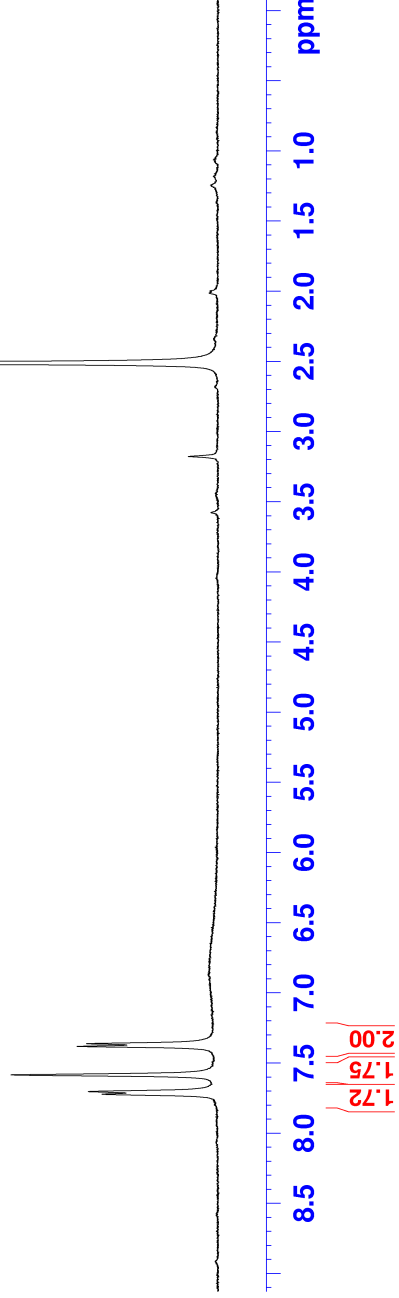

Carbon NMR on bbfo probe

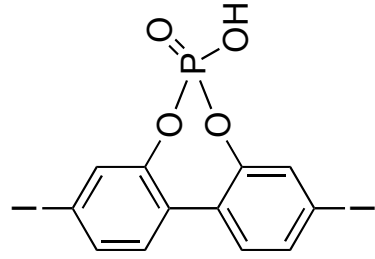

134.85  
131.49  
130.59  
128.30

95.56

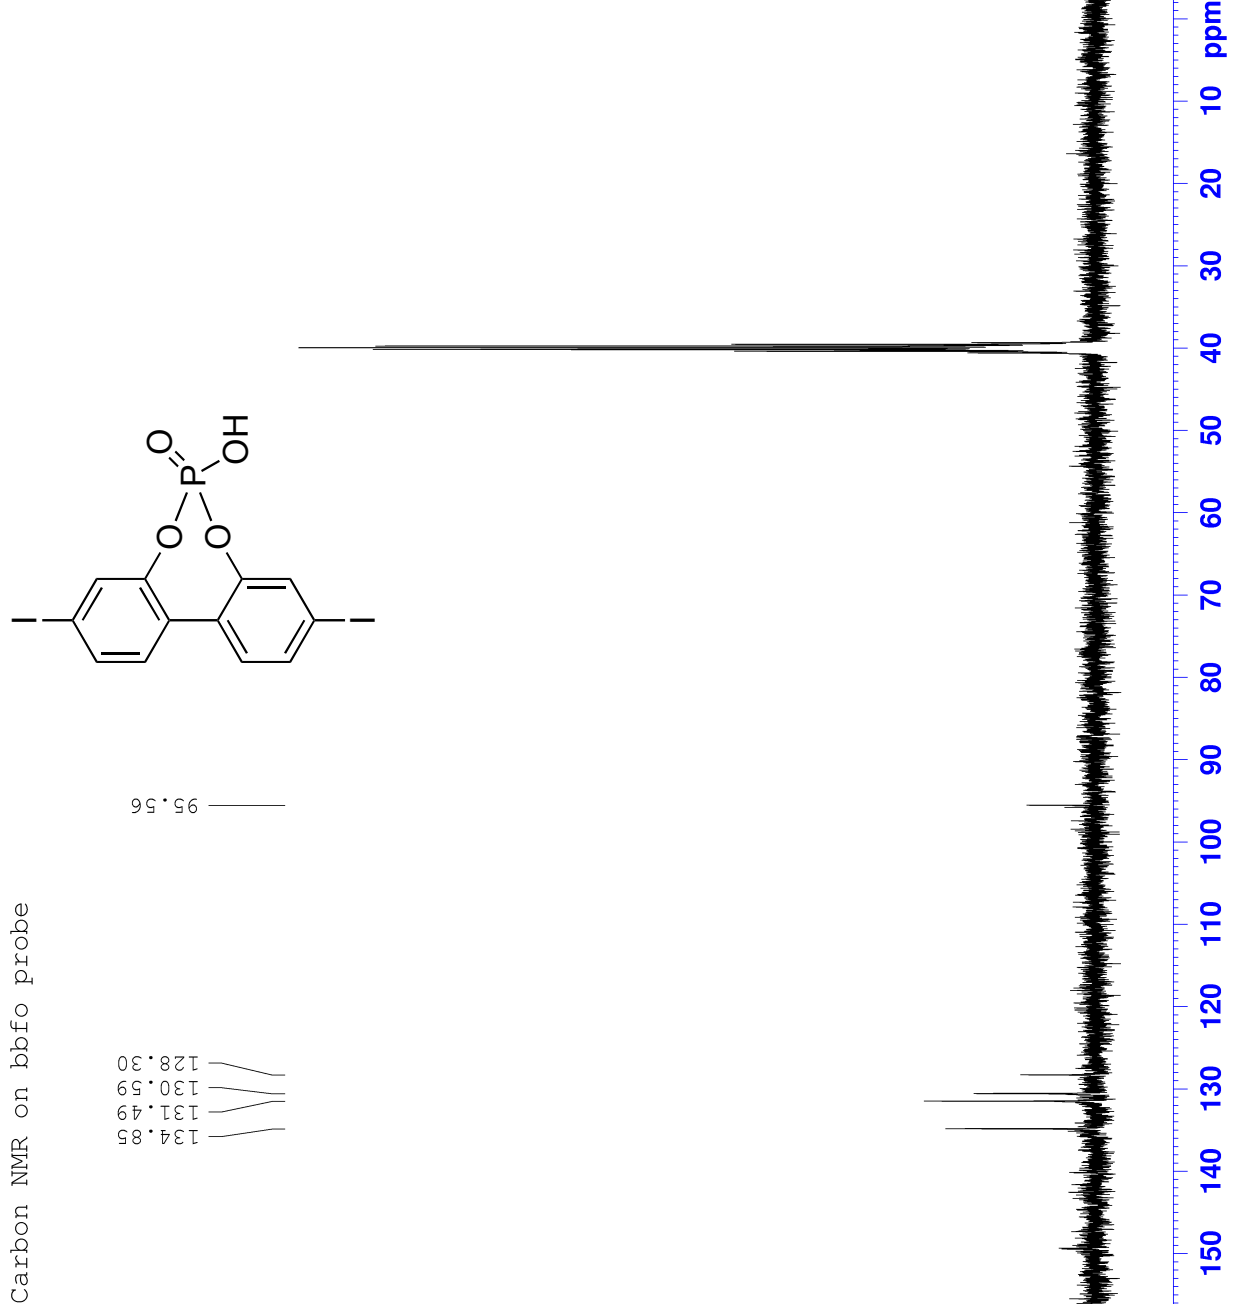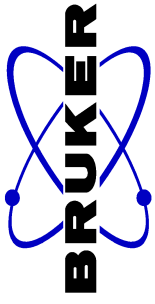

Current Data Parameters  
NAME LR422-recrys  
EXPNO 5  
PROCNO 1

F2 - Acquisition Parameters  
Date\_ 20150331  
Time 13.20  
INSTRUM spect  
PROBHD 5 mm PABBO BB/  
PULPROG zgdc45.fs  
TD 65536  
SOLVENT DMSO  
NS 1024  
DS 0  
SWH 24038.461 H  
FIDRES 0.366798 H  
AQ 1.3631988 s  
RG 287.4  
DW 20.800 u  
DE 6.00 u  
TE 296.1 K  
D1 0.2000000 s  
d11 0.0300000 s  
TD0 1

==== CHANNEL f1 =====  
NUC1 13C  
P1 10.00 u  
PL1 -3.00 c  
SFO1 100.6228298 M

==== CHANNEL f2 =====  
CPDPRG2 waltz16  
NUC2 1H  
PCPD2 100.00 u  
PL2 -2.00 c  
PLI2 14.48 c  
SFO2 400.1316005 M

F2 - Processing parameters  
SI 32768  
SF 100.6127690 M  
WDW EM  
SSB 0  
LB 1.00 H  
GB 0  
PC 1.40

Phosphorus NMR on bbfo probe

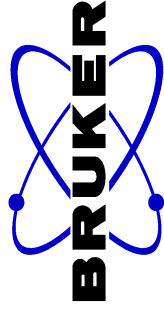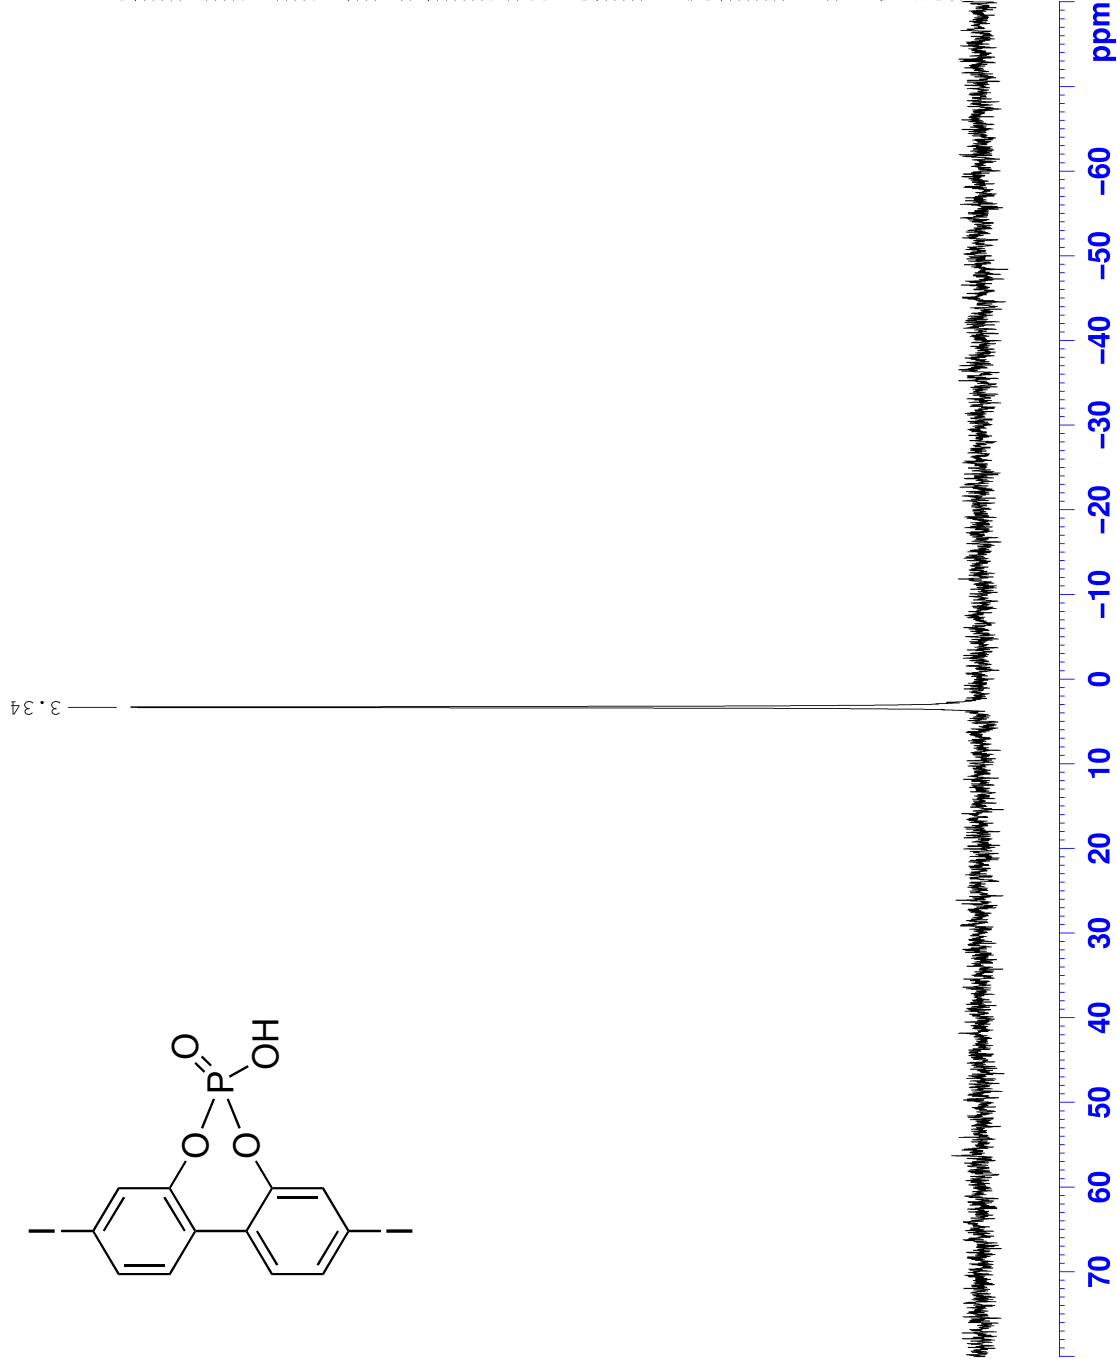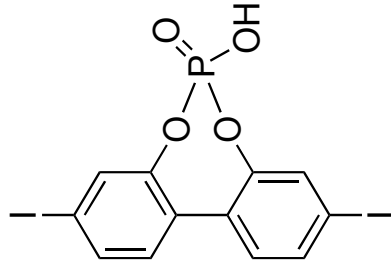

```
Current Data Parameters
NAME      IR442--recrlys
EXPNO     3
PROCNO    1

F2 - Acquisition Parameters
Date_     20150305
Time      16.45
INSTRUM   spect
PROBHD    5 mm PABBO BB/
PULPROG   zgpgc45.fs
TD         32768
SOLVENT   CDC13
NS         242
DS         0
SWH        25940.338 Hz
FIDRES     0.791636 Hz
AQ         0.6316532 sec
RG         9195.2
DW         19.275 use
DE         27.54 use
TE         296.4 K
D1         2.00000000 sec
d11        0.03000000 sec
TD0        1

===== CHANNEL f1 =====
NUC1       31P
P1         10.50 use
PL1        1.00 dB
SFO1       161.9753930 MHz

===== CHANNEL f2 =====
CPDPRG2    waitz16
NUC2       1H
PCPD2      100.00 use
PL2        -2.00 dB
PLI2       14.48 dB
SFO2       400.1320007 MHz

F2 - Processing parameters
SI         32768
SF         161.9753930 MHz
WDW        EM
SSB        0
LB         5.00 Hz
GB         0
PC         1.40
```
